# Supplementary material
Source: PubMed Central journal article supplement (PMC4715975)

# Supplemental Figure 1

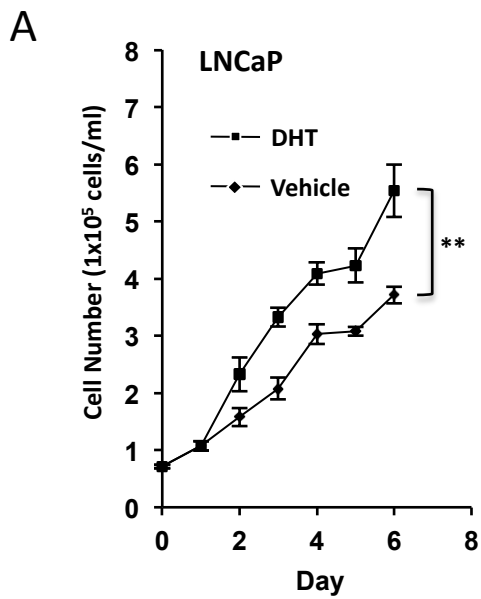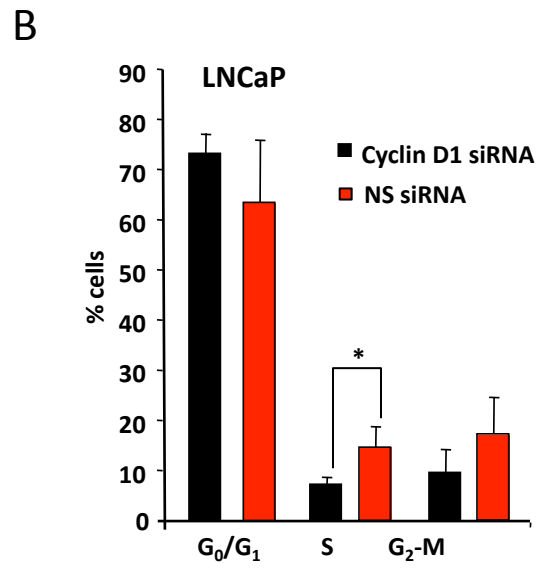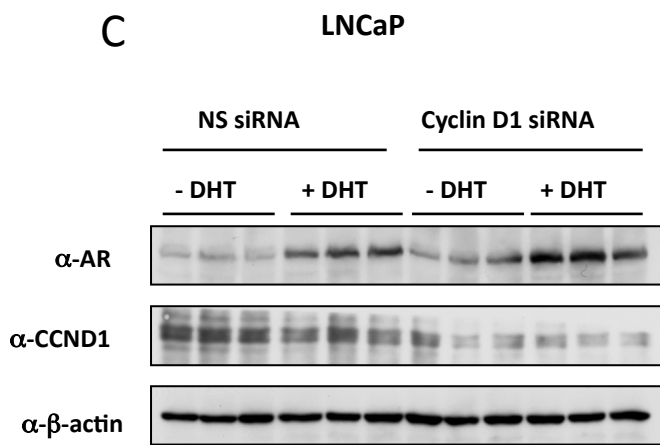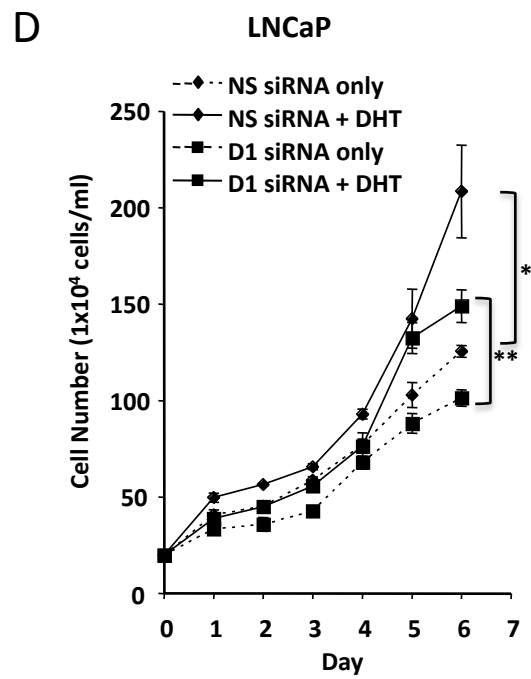

## Supplemental Figure 2

*Cyclin D1*<sup>+/+</sup> (Vehicle)

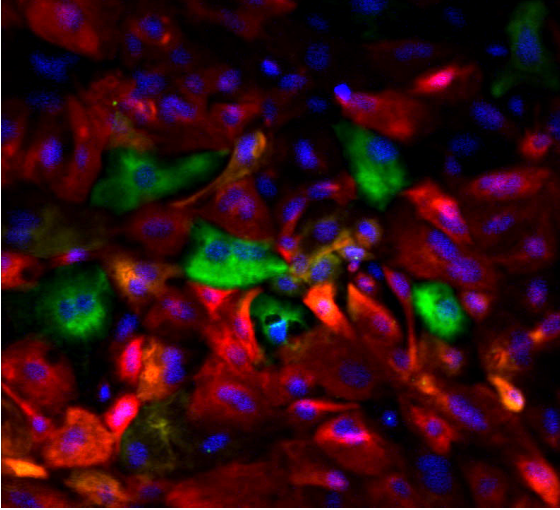

*Cyclin D1*<sup>+/+</sup> (DHT 10 nm)

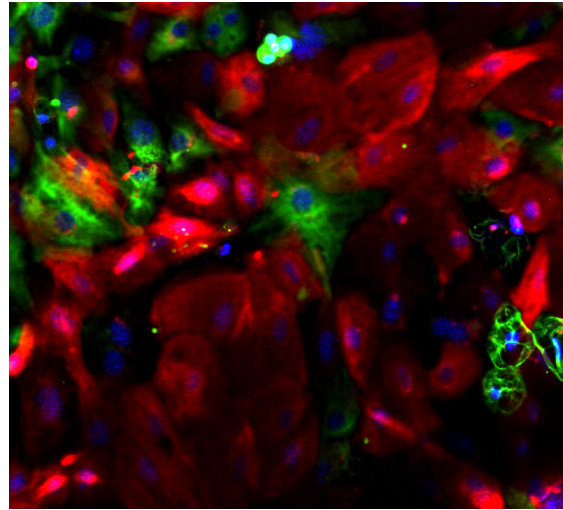

■ CK5

■ CK8

Supplement: NIHMS734185-supplement-1.pdf [file NIHMS734185-supplement-1.pdf]
